# Supplementary material
Source: publisher site journal article supplement (https://www.dovepress.com/article/320381)
Supplement: Supplementary file 1 [file get_supplementary_file.php]

**Supplementary table**. Characteristics of participants

|  | Overall  (n = 391) | Young adult  (n = 193) | Older adult  (n = 198) | p |
| --- | --- | --- | --- | --- |
| Male gender | 249 (63.7) | 128 (66.3) | 121 (61.1) | 0.30 |
| Age (years) | 48.4 ± 12.4 | 38.6 ± 8.7 | 58.0 ± 6.7 | <0.01 |
| Refractive status |  |  |  |  |
| Any myopia | 270 (69.1) | 152 (78.7) | 118 (59.5) | <0.01 |
| Low myopia | 113 (28.9) | 45 (23.3) | 68 (34.3) | 0.02 |
| Moderate myopia | 52 (13.3) | 29 (15.0) | 23 (11.6) | 0.37 |
| High myopia | 105 (26.9) | 78 (40.4) | 27 (13.6) | <0.01 |
| Refractive error (D) | -5.28 ± 4.88 | -6.38 ± 5.29 | -3.87 ± 3.90 | <0.01 |
| Lens state |  |  |  |  |
| Phakic | 296 (75.7) | 156 (80.8) | 140 (70.7) | 0.02 |
| Pseudophakic | 95 (24.3) | 37 (19.2) | 58 (29.3) |
| Lattice degeneration | 40 (10.2) | 28 (14.5) | 12 (6.1) | <0.01 |
| Prior ocular trauma | 30 (7.7) | 17 (8.8) | 13 (6.6) | 0.41 |
| Family history of RD | 3 (0.8) | 2 (1.0) | 1 (0.5) | 0.55 |
